# Supplementary material
Source: publisher site journal article supplement (https://www.dovepress.com/article/610429)
Supplement: Supplementary file 1 [file Supplementary_Figure_1.pdf]

## SUPPLEMENTARY INFORMATION

### Appreciation Questionnaire – English Version

*This questionnaire is the English translation of the original questionnaire administered in French. It is intended to assess the perceived impact of Focused ultrasound (point-of-care ultrasound, POCUS) teaching at the undergraduate medical level on students' learning of anatomy and physiology, and to help guide future educational offerings.*

#### Student Information

1. Please enter today's date (YYYY-MM-DD).
2. Please indicate which residency program you plan to enter at the end of your undergraduate medical training.

#### Educational Material

4. The recommended textbook, Focused Ultrasound Level 1 (Peter Steinmetz, MD; French translation by Dr Claude Topping), helped me understand the concepts covered during the course.

[Strongly agree / Agree / Disagree / Strongly disagree / Not applicable]

5. If you disagree or strongly disagree, please specify why the material was insufficient or suggest alternative resources.

6. The PowerPoint presentations provided helped me review key concepts.

[Strongly agree / Agree / Disagree / Strongly disagree / Not applicable]

7. If you disagree or strongly disagree, please specify how the presentations could be improved.

#### Learning of Anatomy and Physiology

8. Focused ultrasound (point-of-care ultrasound, POCUS) courses helped me reinforce anatomy concepts learned in other courses.

[Strongly agree / Agree / Disagree / Strongly disagree / Not applicable]

9. If you disagree or strongly disagree, please explain your answer or suggest improvements.

10. Focused ultrasound (point-of-care ultrasound, POCUS) courses helped me integrate anatomical knowledge with its application in clinical medicine.

[Strongly agree / Agree / Disagree / Strongly disagree / Not applicable]

11. If you disagree or strongly disagree, please explain your answer or suggest improvements.

12. Integrative Focused ultrasound (point-of-care ultrasound, POCUS) sessions (eg, sepsis, polytrauma, shock) helped me better understand physiological concepts and their clinical relevance.

[Strongly agree / Agree / Disagree / Strongly disagree / Not applicable]

13. If you disagree or strongly disagree, please explain your answer or suggest improvements.

14. I plan to use Focused ultrasound (point-of-care ultrasound, POCUS) during my residency.

[Strongly agree / Agree / Disagree / Strongly disagree / Not applicable]

15. If you disagree or strongly disagree, please explain why or suggest improvements.

### Teaching Evaluation

16. The duration of the Focused ultrasound (point-of-care ultrasound, POCUS) sessions was sufficient to allow hands-on practice.

[Strongly agree / Agree / Disagree / Strongly disagree / Not applicable]

17. If you disagree or strongly disagree, please explain your answer or suggest improvements.

18. Focused ultrasound (point-of-care ultrasound, POCUS) instructors effectively linked anatomical concepts to relevant clinical contexts.

[Strongly agree / Agree / Disagree / Strongly disagree / Not applicable]

19. If you disagree or strongly disagree, please explain your answer or suggest improvements.

20. I appreciated having radiology residents as instructors (selected campuses only).

[Strongly agree / Agree / Disagree / Strongly disagree / Not applicable]

21. Regardless of your rating, please comment on the perceived value of having radiology residents as instructors or suggest improvements.

### Assessment of Learning

22. A written formative assessment (including images and clinical vignettes) after each session would have helped consolidate my learning.

[Strongly agree / Agree / Disagree / Strongly disagree / Not applicable]

23. If you disagree or strongly disagree, please explain why this would not be beneficial.

24. A written formative assessment at the end of Year 4 would have helped consolidate my learning in Focused ultrasound (point-of-care ultrasound, POCUS).

[Strongly agree / Agree / Disagree / Strongly disagree / Not applicable]

25. If you disagree or strongly disagree, please explain why this would not be beneficial.

26. A practical formative assessment (OSCE-type) after each session would have helped consolidate my learning.

[Strongly agree / Agree / Disagree / Strongly disagree / Not applicable]

27. If you disagree or strongly disagree, please explain why this would not be beneficial.

28. A practical formative assessment (OSCE-type) at the end of Year 4 would have helped consolidate my learning in Focused ultrasound (point-of-care ultrasound, POCUS).

[Strongly agree / Agree / Disagree / Strongly disagree / Not applicable]

29. If you disagree or strongly disagree, please explain why this would not be beneficial.

---

### Knowledge Assessment Quiz – English Version

*This quiz is the English translation of the original quiz administered in French. It assesses knowledge retained following undergraduate Focused ultrasound (point-of-care ultrasound, POCUS) teaching sessions. Questions are based on ultrasound images used during the course.*

*The following questions are related to the ultrasound image shown below:*

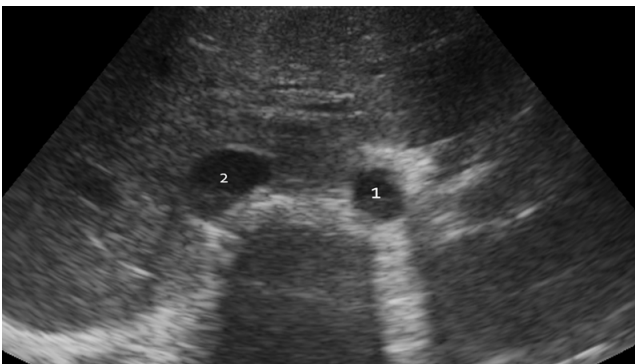

1. What ultrasound view is shown?

- Longitudinal right upper quadrant view
- Subxiphoid cardiac view

- Transverse gallbladder view
- Transverse abdominal aorta view

2. Which structure is indicated by number 1?

- Inferior vena cava
- Gallbladder
- Abdominal aorta
- Femoral artery

3. Which structure is indicated by number 2?

- Inferior vena cava
- Gallbladder
- Abdominal aorta
- Femoral artery

*The following questions are related to this right upper quadrant ultrasound image:*

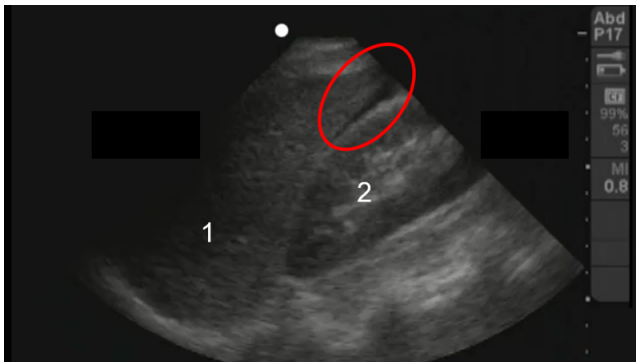

4. Which structure is indicated by number 1?

- Kidney
- Liver
- Spleen
- Gallbladder

5. Which structure is indicated by number 2?

- Kidney
- Liver
- Spleen
- Gallbladder

6. Which pathology is circled in red?

- Pleural effusion
- Free intraperitoneal fluid
- Gallstones
- Hydronephrosis

7. In a polytrauma patient in shock, this finding most strongly suggests:

- Pneumothorax
- Hemothorax
- Hemoperitoneum
- Hemopericardium

*The following questions are related to this subxiphoid cardiac view:*

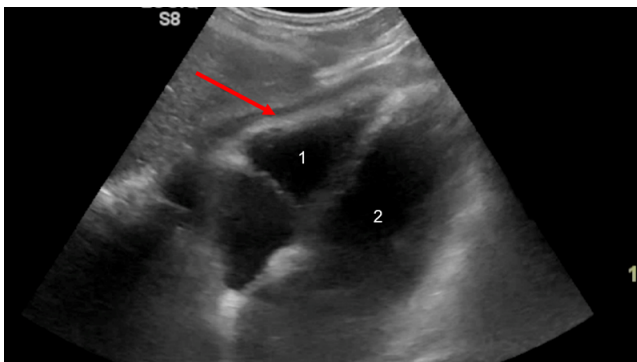

8. Which cardiac structure is indicated by number 1?

- Right atrium

- Left atrium
- Right ventricle
- Left ventricle

9. Which cardiac structure is indicated by number 2?

- Right atrium
- Left atrium
- Right ventricle
- Left ventricle

10. Which bright, hyperechoic structure is indicated by the red arrow?

- Diaphragm
- Inferior pericardium
- Interventricular septum
- Pleura

*The following questions are related to this apical four-chamber cardiac view:*

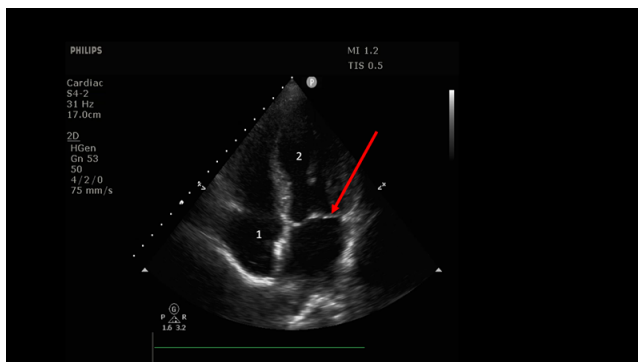

11. Which structure is indicated by number 1?

- Right atrium
- Left atrium
- Right ventricle
- Left ventricle

12. Which structure is indicated by number 2?

- Right atrium
- Left atrium
- Right ventricle
- Left ventricle

13. Which cardiac valve is indicated by the red arrow?

- Aortic valve
- Pulmonic valve
- Mitral valve
- Tricuspid valve

*The following questions are related to this left upper quadrant ultrasound image:*

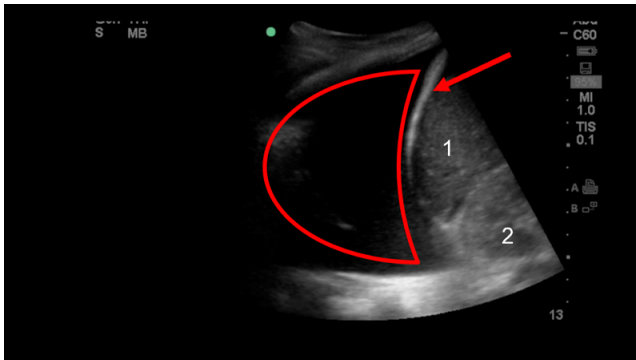

14. Which structure is indicated by number 1?

- Kidney
- Liver
- Spleen
- Gallbladder

15. Which structure is indicated by number 2?

- Kidney
- Spleen

- Liver
- Gallbladder

16. Which bright, hyperechoic structure is indicated by the red arrow?

- Diaphragm
- Pericardium
- Pleura
- Spine

17. What finding is represented by the anechoic (black) cavity?

- Pulmonary consolidation
- Free intraperitoneal fluid
- Pleural effusion
- Pericardial effusion

18. In a polytrauma patient in shock, this finding is most consistent with:

- Pneumothorax
- Hemothorax
- Hemoperitoneum
- Hemopericardium

*The following questions are related to this lung ultrasound image:*

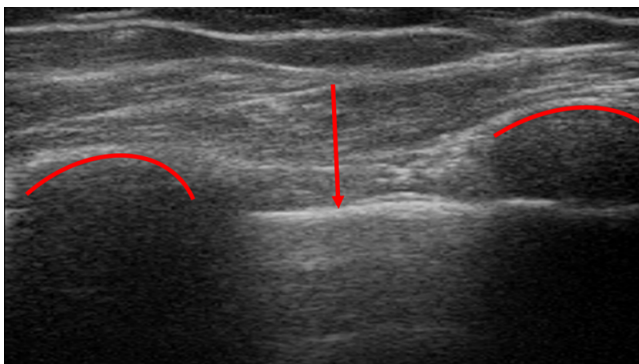

19. Which structure is indicated by the red arrow?

- Pericardium
- Diaphragm
- Pleura
- Spine

20. Which structures (circled) represent the anatomical landmarks of this view?

- Vertebrae
- Intercostal arteries
- Intercostal muscles
- Ribs

21. In a patient presenting with chest pain and dyspnea, absence of pleural sliding most likely indicates:

- Pneumothorax
- Hemothorax
- Hemoperitoneum
- Pneumoperitoneum

*The following questions are related to this right upper quadrant ultrasound image:*

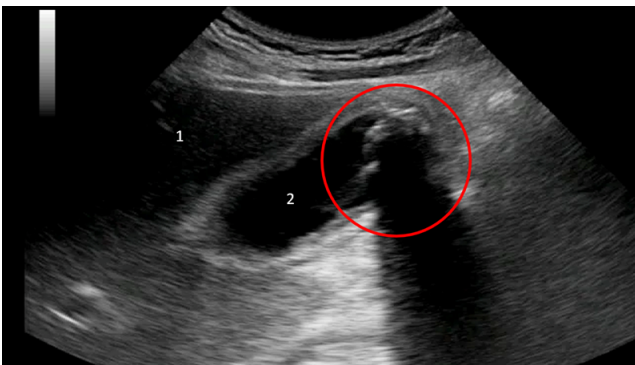

22. Which structure is indicated by number 1?

- Kidney
- Spleen

- Gallbladder
- Liver

23. Which structure is indicated by number 2?

- Kidney
- Spleen
- Gallbladder
- Liver

24. Which significant finding is circled in red?

- Gallstones
- Atheromas
- Placental debris
- Papillary muscles

25. Based on the ultrasound image and the clinical presentation, what is the most likely diagnosis?

- Cholangitis
- Cholecystitis
- Biliary colic
- Choledocholithiasis

*The following questions are related to this sagittal pelvic ultrasound image:*

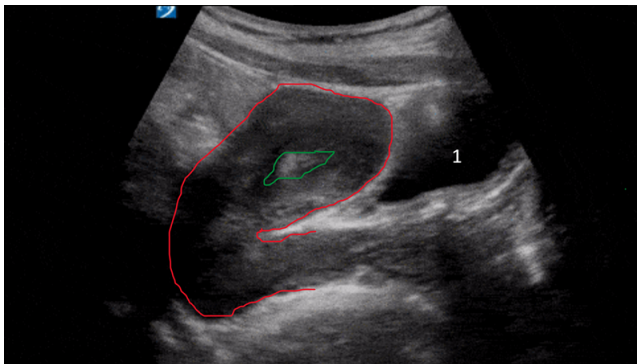

26. Which anechoic (black) structure is indicated by number 1?

- Uterus
- Descending colon
- Left ovary
- Bladder

27. Which structure is circled in red?

- Uterus
- Descending colon
- Left ovary
- Bladder

28. Which bright, hyperechoic structure is circled in green?

- Peritoneum
- Endometrial line
- Diaphragm
- Spine
